# Supplementary material
Source: publisher site journal article supplement (https://www.dovepress.com/article/412366)
Supplement: Supplementary file 1 [file get_supplementary_file.php]

Supplementary Table 1. Parkinson’s disease and perceived prospects for the future in different life domains. Findings of multiple linear and ordered logistic regressions (as appropriate).

|  | Ordered logistic regression | Ordered logistic regression | Ordered logistic regression | Linear regression | Linear regression |
| --- | --- | --- | --- | --- | --- |
| Independent variables | Outcome: Standard of living in the future | Outcome:  Frequency of dealing with death and dying | Outcome: Future self-rated health | Outcome: Perceived longevity | Outcome:  General optimism |
|  | OR (SE) | OR (SE) | OR (SE) | Beta-coefficient (SE) | Beta-coefficient (SE) |
|  |  |  |  |  |  |
| Presence of Parkinson’s disease (Ref.: Absence of Parkinson’s disease) | 1.10 | 1.11 | 4.10*** | 0.02 | -0.04 |
|  | (0.45) | (0.37) | (1.52) | (1.12) | (0.10) |
| Sex: Women (Ref.: Men) | 0.97 | 1.95*** | 0.74*** | -0.04 | 0.05** |
|  | (0.08) | (0.13) | (0.05) | (0.24) | (0.02) |
| Age | 0.99** | 1.00 | 1.02*** | 0.25*** | -0.01*** |
|  | (0.00) | (0.00) | (0.00) | (0.01) | (0.00) |
| Education: - Medium (Ref.: low) | 1.35 | 0.84 | 1.05 | 0.30 | 0.07+ |
|  | (0.27) | (0.13) | (0.18) | (0.47) | (0.04) |
| - High | 1.58* | 1.10 | 1.15 | 0.46 | 0.05 |
|  | (0.33) | (0.17) | (0.20) | (0.48) | (0.04) |
| Marital status: - Married, living separated from spouse (Ref.: Married, living together with spouse) | 1.22 | 1.04 | 0.92 | 1.17+ | -0.01 |
|  | (0.41) | (0.28) | (0.27) | (0.71) | (0.06) |
| - Divorced | 0.84 | 1.09 | 0.96 | -0.26 | -0.04 |
|  | (0.11) | (0.11) | (0.11) | (0.38) | (0.03) |
| - Widowed | 0.73** | 0.99 | 0.89 | -0.24 | 0.02 |
|  | (0.09) | (0.09) | (0.09) | (0.27) | (0.02) |
| - Single | 0.81 | 0.97 | 0.95 | 0.20 | -0.11*** |
|  | (0.13) | (0.12) | (0.13) | (0.50) | (0.03) |
| Smoking: - Yes, sometimes (Ref.: Yes, daily) | 1.28 | 2.73*** | 0.99 | 0.58 | 0.02 |
|  | (0.28) | (0.51) | (0.20) | (0.68) | (0.04) |
| - No, not anymore | 0.79+ | 1.39** | 0.77* | 1.57*** | 0.04 |
|  | (0.11) | (0.15) | (0.09) | (0.45) | (0.03) |
| - Never smoker | 0.79+ | 1.35** | 0.90 | 1.34** | 0.02 |
|  | (0.10) | (0.14) | (0.10) | (0.45) | (0.03) |
| Alcohol: - Several days a week (Ref.: Daily) | 1.14 | 1.00 | 0.99 | 0.22 | 0.03 |
|  | (0.14) | (0.10) | (0.10) | (0.37) | (0.02) |
| - Once a week | 1.32* | 0.96 | 0.91 | 0.19 | 0.02 |
|  | (0.18) | (0.11) | (0.11) | (0.44) | (0.03) |
| - 1-3 times a week | 0.87 | 0.96 | 0.98 | 0.00 | 0.05+ |
|  | (0.13) | (0.12) | (0.13) | (0.43) | (0.03) |
| - Less often | 1.17 | 0.83+ | 0.95 | 0.51 | 0.00 |
|  | (0.16) | (0.09) | (0.11) | (0.39) | (0.03) |
| - Never | 0.86 | 0.97 | 0.88 | -0.59 | 0.01 |
|  | (0.14) | (0.12) | (0.12) | (0.46) | (0.03) |
| Sports activities: - Several days a week (Ref.: Daily) | 0.86 | 0.78* | 1.06 | -0.04 | -0.00 |
|  | (0.11) | (0.08) | (0.12) | (0.43) | (0.02) |
| - Once a week | 0.95 | 0.72** | 1.13 | -0.99* | -0.05+ |
|  | (0.14) | (0.08) | (0.14) | (0.44) | (0.03) |
| - 1-3 times a week | 0.89 | 0.81 | 1.23 | -1.06* | -0.03 |
|  | (0.17) | (0.12) | (0.20) | (0.53) | (0.04) |
| - Less often | 1.16 | 0.75* | 1.32* | -1.05* | -0.05+ |
|  | (0.18) | (0.09) | (0.18) | (0.47) | (0.03) |
| - Never | 1.04 | 0.70*** | 1.21+ | -0.55 | -0.06* |
|  | (0.14) | (0.07) | (0.14) | (0.42) | (0.03) |
| Self-rated health (from 1 = very good to 5 = very bad) | 1.00 | 1.06 | 0.70*** | -1.67*** | -0.12*** |
|  | (0.06) | (0.05) | (0.04) | (0.18) | (0.01) |
| Physical functioning (from 0 = worst to 100 = best) | 1.00 | 1.00 | 1.00* | -0.01* | 0.00 |
|  | (0.00) | (0.00) | (0.00) | (0.01) | (0.00) |
| Number of chronic conditions | 1.03 | 1.06*** | 1.06*** | -0.37*** | -0.03*** |
|  | (0.02) | (0.02) | (0.02) | (0.06) | (0.00) |
| Depressive symptoms (from 0 to 45, higher values reflecting more depressive symptoms) | 1.04*** | 1.08*** | 1.04*** | -0.07** | -0.03*** |
|  | (0.01) | (0.01) | (0.01) | (0.02) | (0.00) |
|  |  |  |  |  |  |
| Observations | 4,261 | 4,281 | 4,157 | 4,005 | 4,296 |
| (Pseudo-) R² | 0.02 | 0.05 | 0.02 | 0.17 | 0.29 |

Comments: Beta coefficients or Odds Ratios (OR) are displayed, as appropriate. Standard errors (SE) in parentheses. *** p<0.001, ** p<0.01, * p<0.05, + p<0.10.
